# Supplementary material
Source: HighWire-hosted journal article supplement (https://bmjopen.bmj.com/content/12/7/e058983)
Supplement: inline-supplementary-material-2 [file inline-supplementary-material-2.pdf]

| <b>Supplementary table 1.</b> Characteristics of 1011 FLS patients that participated and not-participated in this study. |                                |                                    |                |
|--------------------------------------------------------------------------------------------------------------------------|--------------------------------|------------------------------------|----------------|
|                                                                                                                          | <b>Participants</b><br>(n=500) | <b>Non-participants</b><br>(n=511) | <b>P-value</b> |
| Age in years                                                                                                             | 64.6 ± 8.6                     | 68.3 ± 9.8                         | <.001          |
| Female sex                                                                                                               | 357 (71.4)                     | 396 (77.5)                         | .026           |
| Baseline fracture                                                                                                        |                                |                                    |                |
| - Finger or toe                                                                                                          | 58 (11.6)                      | 53 (10.4)                          | <.001          |
| - Minor                                                                                                                  | 311 (62.2)                     | 259 (50.7)                         |                |
| - Major                                                                                                                  | 105 (21.0)                     | 157 (30.7)                         |                |
| - Hip                                                                                                                    | 26 (5.2)                       | 42 (8.2)                           |                |
| - Fall-related *                                                                                                         | 431 (86.2)                     | 441 (86.3)                         | .963           |
| Fall previous year §                                                                                                     |                                |                                    |                |
| - 0                                                                                                                      | 356 (71.2)                     | 359 (70.3)                         | .741           |
| - ≥ 1                                                                                                                    | 144 (28.8)                     | 152 (29.7)                         |                |
| - ≥ 2                                                                                                                    | 72 (14.4)                      | 87 (17.0)                          | .252           |
| BMD                                                                                                                      |                                |                                    |                |
| - Normal BMD                                                                                                             | 135 (27.0)                     | 90 (17.6)                          | <.001          |
| - Osteopenia                                                                                                             | 255 (51.0)                     | 258 (50.5)                         |                |
| - Osteoporosis                                                                                                           | 110 (22.0)                     | 163 (31.9)                         |                |
| Prevalent vertebral fracture                                                                                             |                                |                                    |                |
| - None                                                                                                                   | 366 (73.2)                     | 349 (68.3)                         | .010           |
| - Grade 1                                                                                                                | 63 (12.6)                      | 53 (10.4)                          |                |
| - Grade 2-3                                                                                                              | 71 (14.2)                      | 109 (21.3)                         |                |
| At least one fall past year                                                                                              | 143 (29.3)                     | 152 (29.9)                         | .704           |

Continuous variables are presented as mean ± SD, categorical variables are presented as number of patients (%). § Fall resulting in baseline fracture not included. # According to Genant et al. § According to most severe prevalent vertebral fracture. Abbreviations: BMD, bone mineral density
